# Supplementary material for: Contrasted behaviours of methylthiolated perylene and pyrene as organic semiconductors: implications of molecular electronic structure and crystal structure
Source: Royal Society of Chemistry journal article supplement (doi:10.1039/d3tc02063k), 2023-01-01
Supplement: d3tc02063k1.pdf [file d3tc02063k1.pdf]

*Supporting Information for*

**Contrasted behaviors of methylthiolated perylene and pyrene as organic semiconductors: implications of molecular electronic structure and crystal structure**

Kazuo Takimiya,<sup>a,b,c\*</sup> Kirill Bulgarevich,<sup>a</sup> Shingo Horiuchi,<sup>a,b</sup>

<sup>a</sup>RIKEN Center for Emergent Matter Science (CEMS), 2-1 Hirosawa, Wako, Saitama 351-0198, Japan

<sup>b</sup>Department of Chemistry, Graduate School of Science, Tohoku University, 6-3 Aoba, Aramaki, Aoba-ku, Sendai, Miyagi 980-8578 Japan

<sup>c</sup>Tohoku University Advanced Institute for Materials Research (AIMR), 2-1-1 Katahira, Aoba-ku, Sendai, Miyagi 980-8577 Japan

|                                                                   |           |
|-------------------------------------------------------------------|-----------|
| <b>1. Optimized molecular structures of MT-perylene isomers</b>   | <b>S2</b> |
| <b>2. Characterization of MT-perylene</b>                         | <b>S3</b> |
| <b>3. Crystal structure and transfer integrals of MT-perylene</b> | <b>S5</b> |

## 1. Optimized molecular structures of MT-perylene isomers

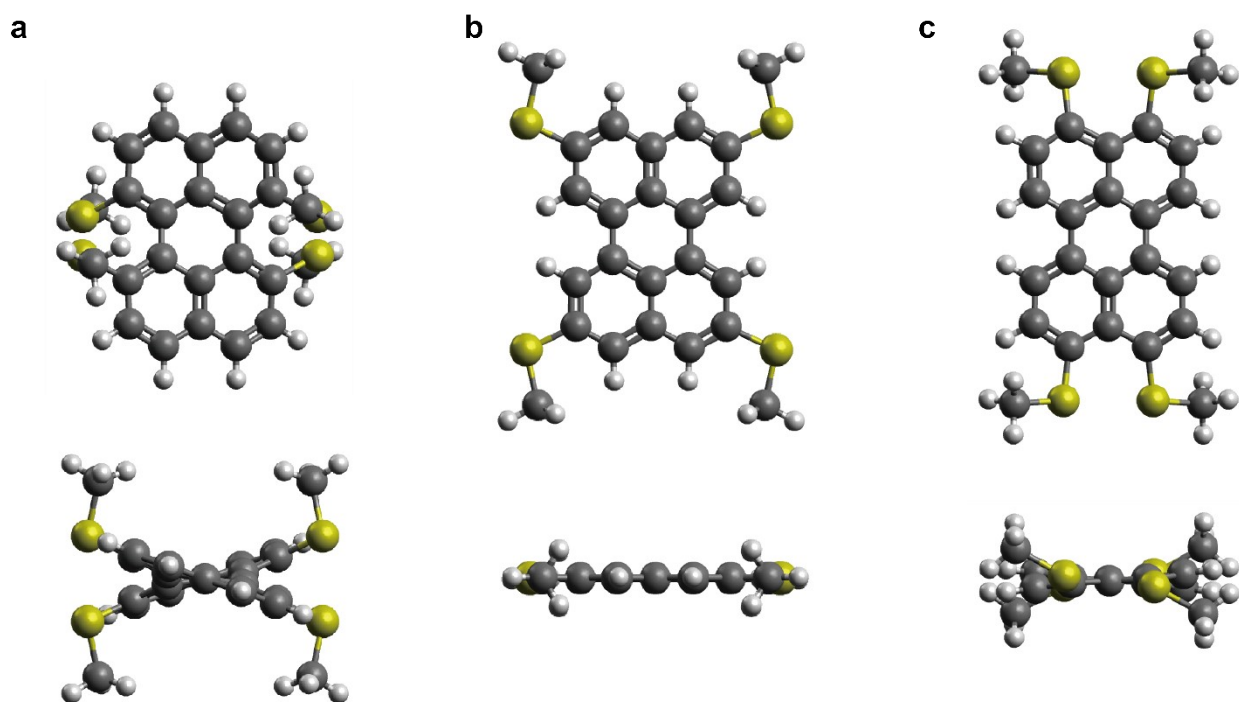

Fig. S1. Optimized molecular structures of (a) 1,6,7,12-, (b) 2,5,8,11-, and (c) 3,4,9,10-tetrakis(methylthio)perylenes. Note that only 2,5,8,11 isomer has a planar molecular structure.

## 2. Characterization of MT-perylene

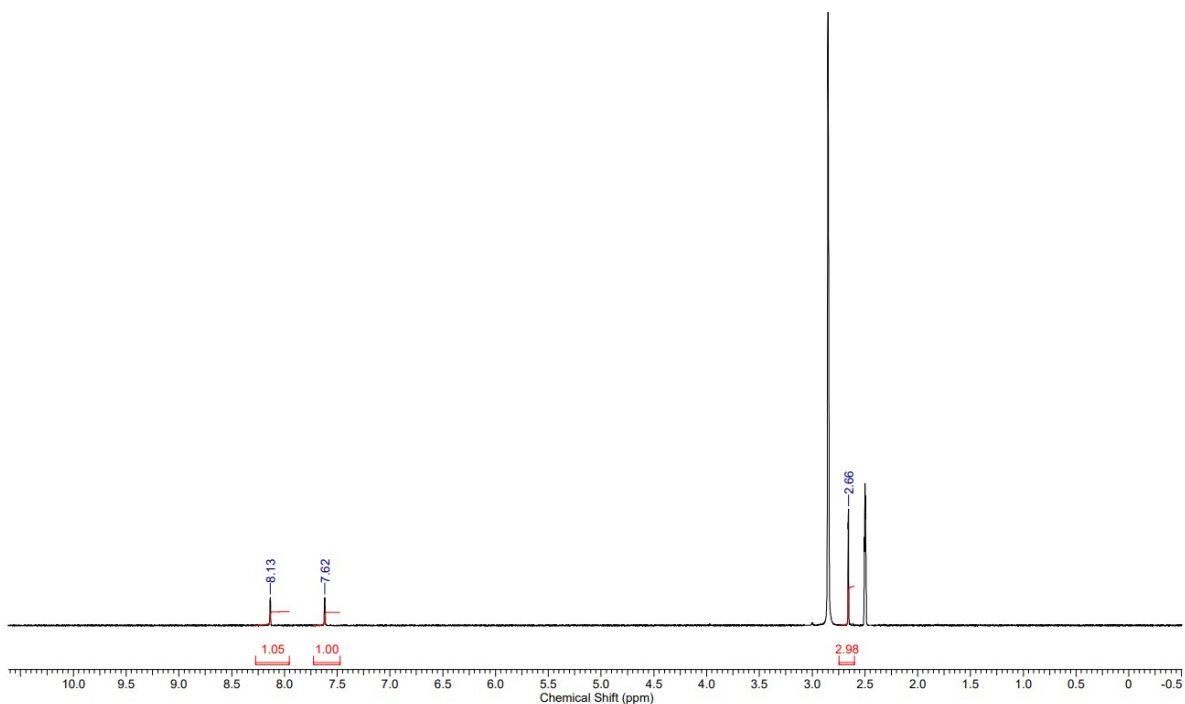

Fig. S2.  $^1\text{H}$  NMR spectra of MT-perylene in  $\text{DMSO-}d_6$  at  $120^\circ\text{C}$ .

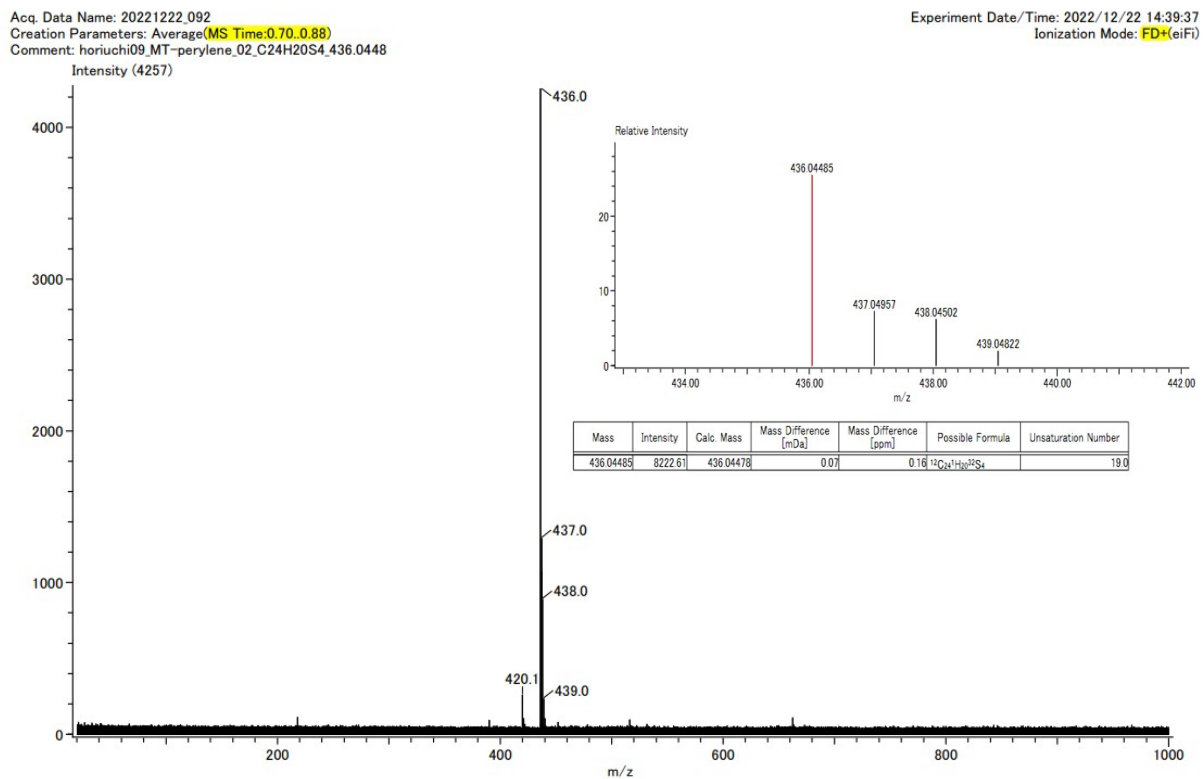

Fig. S3. HRMS spectra of MT-perylene.

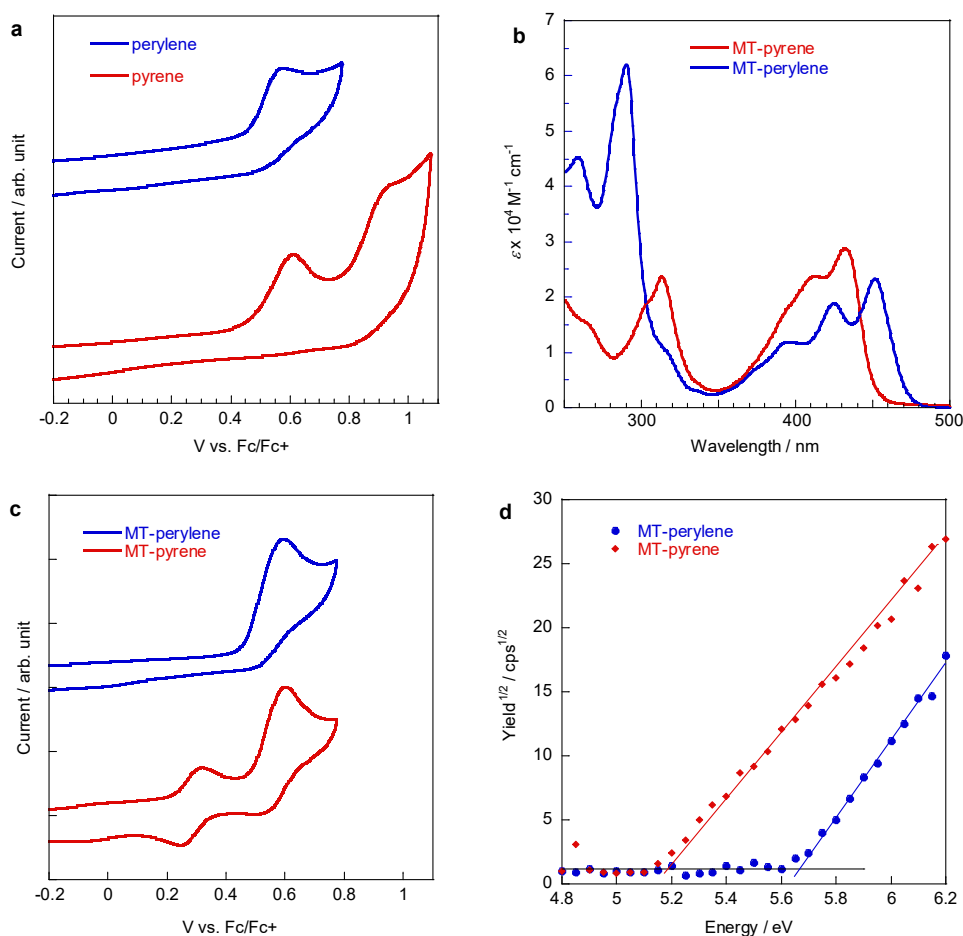

Fig. S4. Cyclic voltammograms of parent perylene and pyrene (a) and physicochemical properties of MT-perylene in comparison with those of MT-pyrene (b-d); (b) UV-vis absorption spectra in chloroform solution, (c) cyclic voltammetry measured in benzonitrile solution containing 0.1 M tetrabutylammonium hexafluorophosphate with the platinum working and counter electrodes, and Ag/AgCl electrode as the reference electrode (the potentials were calibrated against the standard Fc/Fc<sup>+</sup> couple measured under the identical conditions), and (d) ionization potential evaluated by photoelectron spectroscopy in air. From the onset of the oxidation peaks, the  $E_{\text{HOMO}}$  of parent perylene and pyrene were estimated to be  $-5.24$  and  $-5.26$  eV, respectively.

Table S1. Summary of physicochemical properties of MT-perylene and MT-pyrene.

|             | $E_{\text{ox}}$ (onset) / V <sup>a</sup> | $E_{\text{HOMO}}$ / eV <sup>b</sup> | $\lambda_{\text{onset}}$ / nm | $E_{\text{g}}$ / eV <sup>c</sup> | IP / eV |
|-------------|------------------------------------------|-------------------------------------|-------------------------------|----------------------------------|---------|
| MT-perylene | 0.45                                     | $-5.25$ <sup>d</sup>                | 475                           | 2.61                             | 5.68    |
| MT-pyrene   | 0.22                                     | $-5.02$ <sup>d</sup>                | 452                           | 2.73                             | 5.20    |

<sup>a</sup> V vs. Fc/Fc<sup>+</sup>. <sup>b</sup> Estimated from the following equation:  $E_{\text{HOMO}} = -4.80 - E_{\text{ox}}$ . <sup>c</sup> Estimated from the absorption onset. <sup>d</sup>  $E_{\text{HOMO}}$ s of parent perylene and pyrene were estimated to be  $-5.24$  and  $-5.26$  eV, respectively.



### 3. Crystal structure and transfer integrals of MT-perylene

a MT-perylene

b MS-pyrene

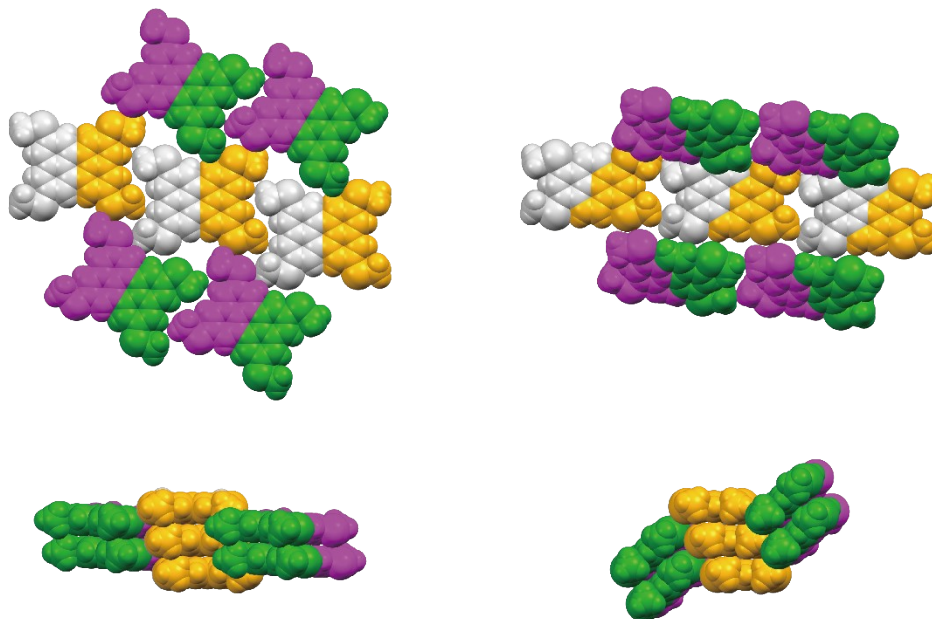

Fig. S5. MS-pyrene's inclined brickwork structure (b) compared to that of MT-perylene (a).

a MT-perylene brickwork

a MT-perylene inclined brickwork

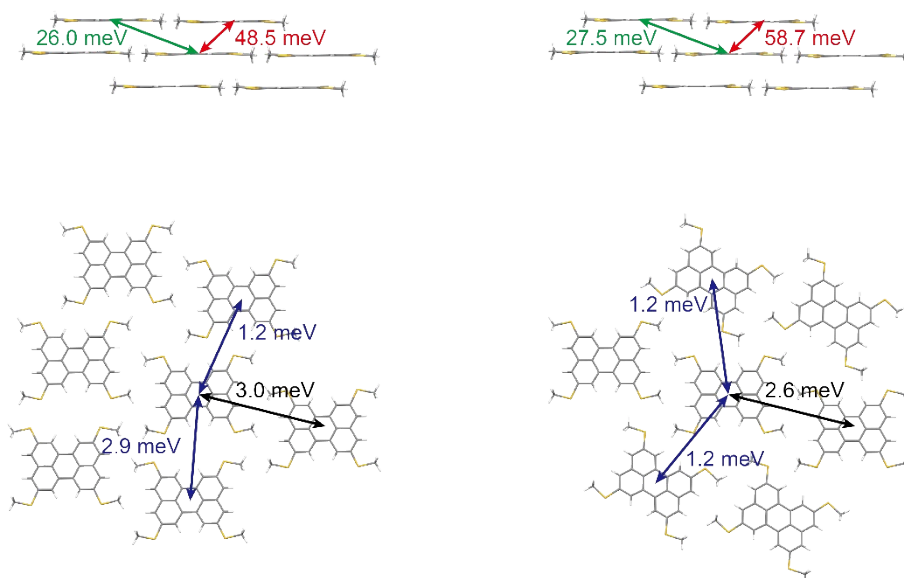

Fig. S6. Calculated transfer integrals of brickwork and inclined brickwork structure of MT-perylene.

Table S2. Crystallographic data of MT-perylene brickwork structure.

| Temperature / K           | 300                                            | 200                                            | 100                                            |
|---------------------------|------------------------------------------------|------------------------------------------------|------------------------------------------------|
| Formula                   | C <sub>24</sub> H <sub>20</sub> S <sub>4</sub> | C <sub>24</sub> H <sub>20</sub> S <sub>4</sub> | C <sub>24</sub> H <sub>20</sub> S <sub>4</sub> |
| Molecular Weight          | 436.64                                         | 436.64                                         | 436.64                                         |
| Crystal Habit             | plate                                          | plate                                          | plate                                          |
| Crystal System            | <i>triclinic</i>                               | <i>triclinic</i>                               | <i>triclinic</i>                               |
| Space Group               | <i>P</i> -1                                    | <i>P</i> -1                                    | <i>P</i> -1                                    |
| <i>a</i> / Å              | 4.8974(3)                                      | 4.8846(3)                                      | 4.8621(3)                                      |
| <i>b</i> / Å              | 9.4432(5)                                      | 9.3854(5)                                      | 9.3471(5)                                      |
| <i>c</i> / Å              | 11.1155(7)                                     | 11.0554(4)                                     | 11.0114(8)                                     |
| $\alpha$ / °              | 89.740(5)                                      | 90.232(4)                                      | 90.500(5)                                      |
| $\beta$ / °               | 79.373(5)                                      | 100.626(4)                                     | 100.650(5)                                     |
| $\gamma$ / °              | 87.973(5)                                      | 91.646(4)                                      | 91.424(4)                                      |
| <i>V</i> / Å <sup>3</sup> | 504.93(5)                                      | 497.90(4)                                      | 491.61(5)                                      |
| <i>Z</i>                  | 1                                              | 1                                              | 1                                              |
| <i>R</i>                  | 0.0472                                         | 0.0540                                         | 0.0620                                         |
| <i>R</i> <sub>w</sub>     | 0.1541                                         | 0.1565                                         | 0.1709                                         |
| GOF                       | 1.095                                          | 1.069                                          | 1.064                                          |

Table S3. Crystallographic data of MT-perylene inclined brickwork structure.

| Temperature / K           | 300                                            | 200                                            | 100                                            |
|---------------------------|------------------------------------------------|------------------------------------------------|------------------------------------------------|
| Formula                   | C <sub>24</sub> H <sub>20</sub> S <sub>4</sub> | C <sub>24</sub> H <sub>20</sub> S <sub>4</sub> | C <sub>24</sub> H <sub>20</sub> S <sub>4</sub> |
| Molecular Weight          | 436.64                                         | 436.64                                         | 436.64                                         |
| Crystal Habit             | plate                                          | plate                                          | plate                                          |
| Crystal System            | <i>monoclinic</i>                              | <i>monoclinic</i>                              | <i>monoclinic</i>                              |
| Space Group               | <i>P</i> 2 <sub>1</sub> / <i>n</i>             | <i>P</i> 2 <sub>1</sub> / <i>n</i>             | <i>P</i> 2 <sub>1</sub> / <i>n</i>             |
| <i>a</i> / Å              | 4.8598(2)                                      | 4.8514(2)                                      | 4.8336(2)                                      |
| <i>b</i> / Å              | 22.1181(10)                                    | 22.0402(9)                                     | 21.9293(8)                                     |
| <i>c</i> / Å              | 9.4583(4)                                      | 9.4012(3)                                      | 9.3596(3)                                      |
| $\alpha$ / °              | 90                                             | 90                                             | 90                                             |
| $\beta$ / °               | 92.098(4)                                      | 91.773(3)                                      | 91.596(3)                                      |
| $\gamma$ / °              | 90                                             | 90                                             | 90                                             |
| <i>V</i> / Å <sup>3</sup> | 1015.99(8)                                     | 1004.75(7)                                     | 991.71(6)                                      |
| <i>Z</i>                  | 2                                              | 2                                              | 2                                              |
| <i>R</i>                  | 0.0525                                         | 0.0792                                         | 0.0754                                         |
| <i>R</i> <sub>w</sub>     | 0.1615                                         | 0.2088                                         | 0.2270                                         |
| GOF                       | 1.107                                          | 1.143                                          | 1.090                                          |
